# Supplementary material for: Detection of mcr-1 Gene in Undefined Vibrio Species Isolated from Clams
Source: MDPI journal article supplement (doi:10.3390/microorganisms10020394), 2022-02-08
Supplement: s1 [file s1]

# Detection of *mcr-1* gene in undefined *Vibrio* species isolated from clams

Christian Valdez <sup>1†</sup>, Cátia Costa <sup>1†</sup>, Marco Simões <sup>1</sup>, Carla C.C.R. de Carvalho<sup>2</sup>, Teresa Baptista<sup>1</sup> and Maria Jorge Campos<sup>1\*</sup>

<sup>1</sup> MARE-Marine and Environmental Sciences Centre, ESTM, Polytechnic of Leiria, 2520-630 Peniche, Portugal; catia.g.costa@ipleiria.pt (C. C.); 4180268@my.ipleiria.pt (C. V.); marco.a.simo@ipleiria.pt (M. S.); teresa.baptista@ipleiria.pt (T. B.)

<sup>2</sup> iBB-Institute for Bioengineering and Biosciences, Department of Bioengineering, Associate Laboratory i4HB—Institute for Health and Bioeconomy, Instituto Superior Técnico, Universidade de Lisboa, , Av. Rovisco Pais, 1049-001 Lisboa, Portugal; ccarvalho@tecnico.ulisboa.pt (C. C.)

\* Correspondence: mcamos@ipleiria.pt (M. J. C.)

<sup>†</sup> These authors contributed equally to the development of this study

## Supplementary Materials

**Table S1.** The five house-keeping genes (*recA*, *rpoB*, *groEl*, *16S* and *dnaJ*) and respective primers that were used to identify the isolates. The primers that were used to test antimicrobial resistances genes presence belongs to three classes. The first class of antibiotics searched was polymyxins (*mcr-1*, *mcr-2*, *mcr-3*, *mcr-4*, *mcr-5*, *mcr-6*, *mcr-7*, *mcr-8* and *mcr-9*). The second class was  $\beta$ -lactams (*bla<sub>IMP</sub>*, *bla<sub>VIM</sub>*, *bla<sub>KPC</sub>*, *bla<sub>NDM</sub>*, *bla<sub>OXA</sub>*, *bla<sub>CTX-M</sub>*, *bla<sub>SHV</sub>* and *bla<sub>TEM</sub>*). The third antimicrobial class searched was quinolone (*qnrA*, *qnrB*, *qnrC*, *qnrD*, *qnrS* and *qepA*). The virulence genes searched in the three isolates colistin resistant were *chiA*, *vhpA*, *luxR*, *flaC*, *hlyA*, *tlh*, *tdh*, *trh*, *ctxA*, *ompU*, *zot*, *tcpI*, *tcpA*, *sno/sto*, *vvh*, *vpi*, *yrpI*, *ompK* and *vhh*.

| Genes                    | FW                            | REV                            | TA (°C) | Reference |
|--------------------------|-------------------------------|--------------------------------|---------|-----------|
| <i>recA</i>              | 5'-GTCTACCAATGGGTCGTATC-3'    | 5'-GCCATTGTAGCTGTACCAAG-3'     | 60      | [95]      |
| <i>rpoB</i>              | 5'-GAGTCTTCGAAGTTGTAACC-3'    | 5'-GGCGAAATGGCWGAGAACCA-3'     | 51.5    | [96]      |
| <i>groEl</i>             | 5'-TCCARAACATGGGGCGCACAA-3'   | 5'-ACGTTTGTGCTTCTCGTGTGTCRC-3' | 68      | [97]      |
| <i>16S rRNA</i>          | 5'-AGAGTTTGATCCTGGCTCAG-3'    | 5'-GGTACCTTGTACGACTT-3'        | 56      | [98]      |
| <i>dnaJ</i>              | 5'-GATYTRCGHTAYAACATGGA-3'    | 5'-TTCACRCCRTYDAAGAARC-3'      | 50      | [99]      |
| <i>mcr-1</i>             | 5'-AGTCCGTTTGTCTTGTGGC-3'     | 5'-AGATCCCTTGGTCTCGGCTTG-3'    | 60      | [100]     |
| <i>mcr-2</i>             | 5'-CAAGTGTGTTGGTCGCAGTT-3'    | 5'-TCTAGCCCGACAAGCATACC-3'     | 58      | [100]     |
| <i>mcr-3</i>             | 5'-AAATAAAAATTGTTCCGCTTATG-3' | 5'-AATGGAGATCCCCGTTTTT-3'      | 58      | [100]     |
| <i>mcr-4</i>             | 5'-TCACTTTCATCACTGCGTTG-3'    | 5'-TTGGTCCATGACTACCAATG-3'     | 58      | [100]     |
| <i>mcr-5</i>             | 5'-ATGCGGTGTCTGCATTATC-3'     | 5'-TCATGTGGTTGTCTTTTCTG-3'     | 58      | [100]     |
| <i>mcr-6</i>             | 5'-GTCCGGTCAATCCCTATCTGT-3'   | 5'-ATCACGGGATTGACATAGCTAC-3'   | 58      | [100]     |
| <i>mcr-7</i>             | 5'-TGCTCAAGCCCTTCTTTTCGT-3'   | 5'-TTCATCTGCGCCACCTCGT-3'      | 55      | [101]     |
| <i>mcr-8</i>             | 5'-AACCGCCAGAGCACAGAATT-3'    | 5'-TTCCCCAGCGATTCTCCAT-3'      | 60      | [101]     |
| <i>mcr-9</i>             | 5'-CGGTACCGCTACCGCAATAT-3'    | 5'-ATAACAGCGAGACACCGGTT-3'     | 58      | [101]     |
| <i>bla<sub>IMP</sub></i> | 5'-GGAATAGAGTGGCTTAAYTCTC-3'  | 5'-GGTTTAAAYAAAACAACCACC-3'    | 50      | [102]     |
| <i>bla<sub>VIM</sub></i> | 5'-GATGGTGTGTCGCATA-3'        | 5'-CGAATGCGCAGCACCAG-3'        | 55      | [102]     |

|                            |                                       |                                          |    |       |
|----------------------------|---------------------------------------|------------------------------------------|----|-------|
| <i>bla<sub>KPC</sub></i>   | 5'-CGTCTAGTCTCTGCTGTCTTG-3'           | 5'-CTTGTCATCCTTGTTAGGCG-3'               | 52 | [102] |
| <i>bla<sub>NDM</sub></i>   | 5'-GGTTTGGCGATCTGGTTTC-3'             | 5'-CGGAATGGCTCATCACGATC-3'               | 52 | [102] |
| <i>bla<sub>oxa</sub></i>   | 5'-GCGTGGTTAAGGATGAACAC-3'            | 5'-CATCAAGTTCAACCCAACCG-3'               | 52 | [103] |
| <i>bla<sub>CTX-M</sub></i> | 5'-ATGTGCAGYACCACTAARGTKATGGC-3'      | 5'-TGGGTRAARTARGTSAC-<br>CAGAAYCAGCGG-3' | 60 | [102] |
| <i>bla<sub>SHV</sub></i>   | 5'-ATGCGTTATATTCGCCTGTG-3'            | 5'-TGCTTTGTTATTCGGGCCAA-3'               | 55 | [102] |
| <i>bla<sub>TEM</sub></i>   | 5'-TCGCCGCATACACTATTCTCAGAATGA-<br>3' | 5'-<br>ACGCTCACCGGCTCCAGATTAT-3'         | 50 | [102] |
| <i>qnrA</i>                | 5'-AGAGGATTTCTCACGCCAGG-3'            | 5'-TGCCAGGCACAGATCTTGAC-3'               | 54 | [104] |
| <i>qnrB</i>                | 5'-GGMATHGAAATTCGCCACTG-3'            | 5'-TTTGCYGYCGCCAGTCGAA-3'                | 54 | [104] |
| <i>qnrC</i>                | 5'-GGGTGTACATTTATTGAATC-3'            | 5'-TCCACTTACGAGGTTCT-3'                  | 50 | [105] |
| <i>qnrD</i>                | 5'-CGAGATCAATTTACGGGGAATA-3'          | 5'-AACAAAGCTGAAGCGCCTG-3'                | 50 | [105] |
| <i>qnrS</i>                | 5'-GCAAGTTCATTGAACAGGGT-3'            | 5'-TCTAAACCGTCGAGTTCGGCG-3'              | 54 | [104] |
| <i>qepA</i>                | 5'-AACTGCTTGAGCCCGTAGAT-3'            | 5'-GTCTACGCCATGGACCTCAC-3'               | 50 | [106] |
| <i>chiA</i>                | 5'-GGAAGATGGCGTGATTGACT-3'            | 5'-GGCATCAATTTCCCAAGAGA-3'               | 50 | [107] |
| <i>vhpA</i>                | 5'-CTGAACGACGCCCATTTT-3'              | 5'-CGCTGACACATCAAGGCTAA-3'               | 50 | [107] |
| <i>luxR</i>                | 5'-ATGGACTCAATTGCAAAGAG-3'            | 5'-TTAGTGATGTTACGGTTGT-3'                | 50 | [107] |
| <i>flaC</i>                | 5'-AAATCATTCCAAATCGGTGC-3'            | 5'-TCTTTGATTCGGCTCTTA-3'                 | 58 | [108] |
| <i>hlyA</i>                | 5'-GGCAAACAGCGAAACAAATACC-3'          | 5'-CTCAGCGGGCTAATACGGTTTA-3'             | 60 | [109] |
| <i>tlh</i>                 | 5'-AAAGCGGATTATGCAGAAGCACTG-3'        | 5'-GCTACTTTCTAGCATTCTCTGC-3'             | 54 | [110] |
| <i>tdh</i>                 | 5'-GTAAAGGTCTCTGACTTTTGAC-3'          | 5'-TGGAATAGAACCTTCATCTTACC-3'            | 58 | [110] |
| <i>trh</i>                 | 5'-TTGGCTTCGATATTTTCACTATCT-3'        | 5'-CATAACAAACATATGCCCATTTCCG-3'          | 58 | [110] |
| <i>ctxA</i>                | 5'-CGGGCAGATTCTAGACCTCCTG-3'          | 5'-CGATGATCTTGGAGCATTCCCAC-3'            | 62 | [111] |
| <i>ompU</i>                | 5'-ACGCTGACGGAATCAACCAAAG-3'          | 5'-GCGGAAGTTGGCTTGAAGTAG-3'              | 61 | [111] |
| <i>zot</i>                 | 5'-TCGCTTAACGATGGC GCGTTTT-3'         | 5'-AACCCCGTTTCACTTCTA CCA-3'             | 61 | [112] |
| <i>tcpI</i>                | 5'-TAGCCTTAGTTCTCA GCAGGCA-3'         | 5'-GGCAATAGTGTGAGCTC GTTA-3'             | 60 | [112] |
| <i>tcpA</i>                | 5'-CCTTCGATCCCCTAA GCAATAC-3'         | 5'-AGGGTTAGCAACGATGCG TAAG-3'            | 60 | [112] |
| <i>sno/sto</i>             | 5'-TCGCATTTAGCCAAA CAGTAGAAA-3'       | 5'-GCTGGATTGCAACATATT TCGC-3'            | 55 | [112] |
| <i>vvh</i>                 | 5'-GCTATTTACCGCCGCTCAC-3'             | 5'-CCGCAGAGCCGTAAACCGAA-3'               | 55 | [113] |
| <i>vpi</i>                 | 5'-GCAATTTAGGGGCGCGACGT-3'            | 5'-CCGCTCTTCTTGATCTGGTAG-3'              | 52 | [114] |
| <i>yrpl</i>                | 5'-TATTCAACTGAAAGTGTA-3'              | 5'-ATAGCTCATAATACTGA-3'                  | 60 | [115] |
| <i>ompK</i>                | 5'-GGCGGTCGCTCTGGTATT-3'              | 5'-TTGCCATCGTAAGTGCTGTA-3'               | 55 | [116] |
| <i>vhh</i>                 | 5'-ATCATGAATAAACTATTACGTTACT-3'       | 5'-GAAAGGATGGTTTGACAAT-3'                | 55 | [117] |
| <i>toxR</i>                | 5'-GATTAGGAAGCAACGAAAG-3'             | 5'-GCAATCACTTCCACTGGTAAC-3'              | 54 | [118] |

**Table S2.** Accession numbers from NCBI of the species used to performed MLSA on MEGA X software.

| Species strain                               | Accession number    |
|----------------------------------------------|---------------------|
| <i>Vibrio alginolyticus</i> VIO5             | AP022861.1          |
| <i>Vibrio anguillarum</i> NB10               | LK021130.1          |
| <i>Vibrio atlanticus</i> NC_011753           | NC_011753.2         |
| <i>Vibrio barjaei</i> 3062                   | NR_152641.1         |
| <i>Vibrio bathopelagicus</i> Sal10           | NZ_CP062500.1       |
| <i>Vibrio campbellii</i> LA16-V1             | NZ_CP021145.1       |
| <i>Vibrio comitans</i> NBRC 102076           | NZ_BJLH01000038.1   |
| <i>Vibrio coralliilyticus</i> RE98           | CP009617.1          |
| <i>Vibrio crassostreae</i> 00-69-1           | NZ_VTXY01000034.1   |
| <i>Vibrio cholerae</i> PS4                   | NZ_CP077197.1       |
| <i>Vibrio cyclitrophicus</i> ECSMB14105      | NZ_CP039700.1       |
| <i>Vibrio diabolicus</i> FDAARGOS_105        | NZ_CP014036.1       |
| <i>Vibrio fluvialis</i> A8                   | NZ_CP053664.1       |
| <i>Vibrio galathea</i> S2757                 | JXXV01000001.1      |
| <i>Vibrio gazogenes</i> ATCC 43942           | NZ_CP018835.1       |
| <i>Vibrio hangzhouensis</i> CGMCC 1.7062     | NZ_FNVG01000060.1   |
| <i>Vibrio harveyi</i> ATCC 33843 (392 [MAV]) | NZ_CP009467.1       |
| <i>Vibrio ichthyenteri</i> ATCC 700023       | AFWF01000003.1      |
| <i>Vibrio jasicida</i> TCFB 0772             | NZ_BAOG01000278.1   |
| <i>Vibrio mediterranei</i> QT6D1             | NZ_CP018308.1       |
| <i>Vibrio mediterranei</i> 117-T6            | NZ_CP033579.1       |
| <i>Vibrio mediterranei</i> Vic-OC-097        | NZ_JABXGK01000008.1 |
| <i>Vibrio mediterranei</i> V7A               | NZ_PYVE01000089.1   |
| <i>Vibrio navarrensis</i> 20-VB00237         | CP065217.1          |
| <i>Vibrio nigripulchritudo</i> SFn1          | FO203527.1          |
| <i>Vibrio owensii</i> 20160513VC2W           | CP030798.1          |
| <i>Vibrio parahaemolyticus</i> MAVP-R        | CP022552.2          |
| <i>Vibrio plantisponsor</i> LMG 24470        | NZ_JABEQC00000000.1 |
| <i>Vibrio scopthalmi</i> VS-05               | NZ_CP016414.1       |
| <i>Vibrio splendidus</i> BST398              | NZ_CP031055.1       |
| <i>Vibrio thalassae</i> CECT 8203            | NR_134228.1         |
| <i>Vibrio tubiashii</i> ATCC 19109           | NZ_CP009354.1       |
| <i>Vibrio variabilis</i> T01                 | KP329555.1          |
| <i>Vibrio vulnificus</i> CMCP6               | NC_004459.3         |
| <i>Vibrio xuii</i> DSM 17185                 | MH315871.1          |
| <i>Grimontia hollisae</i> FDAARGOS_111       | NZ_CP014056.2       |
| <i>Photobacterium damsela</i> 9046-81        | NZ_CP046752.1       |

**Table S3.** Antimicrobial susceptibility test using colistin, imipenem, cefotaxime, meropenem and ciprofloxacin disks. The halo measurements displayed in mm.

| Isolate | Colistin<br>(mm) | Imipenem<br>(mm) | Cefotaxime<br>(mm) | Meropenem<br>(mm) | Ciprofloxacin<br>(mm) |
|---------|------------------|------------------|--------------------|-------------------|-----------------------|
| NB04V   | 13               | 32               | 37                 | 30                | 27                    |
| NB08V   | 20               | 35               | 37                 | 39                | 32                    |
| NB09V   | 22               | 25               | 32                 | 32                | 34                    |
| NB10V   | 35               | 40               | 37                 | 36                | 35                    |
| NB11V   | 22               | 32               | 35                 | 36                | 26                    |
| NB12V   | 25               | 33               | 30                 | 35                | 35                    |
| NB13V   | 40               | 39               | 40                 | 37                | 36                    |
| NB14V   | 39               | 40               | 36                 | 38                | 36                    |
| NB15V   | 18               | 30               | 36                 | 34                | 27                    |
| NB16B   | 22               | 30               | 36                 | 33                | 28                    |
| NB17V   | 22               | 31               | 35                 | 34                | 29                    |
| NB18V   | 22               | 32               | 37                 | 35                | 27                    |
| NB19V   | 13               | 30               | 34                 | 32                | 28                    |
| NB20V   | 14               | 34               | 37                 | 40                | 29                    |
| NB21V   | 20               | 34               | 40                 | 36                | 30                    |
| NJ01V   | 19               | 30               | 36                 | 33                | 28                    |
| NJ02V   | 18               | 34               | 38                 | 32                | 30                    |
| NJ04V   | 19               | 35               | 40                 | 33                | 29                    |
| NJ06V   | 13               | 32               | 37                 | 32                | 26                    |
| NJ07V   | 15               | 27               | 35                 | 32                | 27                    |
| NJ10V   | 40               | 37               | 36                 | 40                | 34                    |
| NJ12V   | 20               | 34               | 40                 | 35                | 30                    |
| NJ13V   | 20               | 34               | 34                 | 35                | 28                    |
| NJ14V   | 22               | 30               | 36                 | 35                | 35                    |
| NJ15V   | 20               | 30               | 34                 | 36                | 27                    |
| NJ18V   | 10               | 25               | 30                 | 36                | 29                    |
| NJ21V   | 0                | 35               | 35                 | 32                | 35                    |
| NJ22V   | 0                | 34               | 37                 | 33                | 32                    |
| NB01E   | 14               | 35               | 25                 | 30                | 40                    |
| NB02E   | 13               | 32               | 17                 | 26                | 30                    |
| NB03E   | 12               | 32               | 35                 | 35                | 34                    |
| NB04E   | 12               | 30               | 32                 | 33                | 33                    |
| NB05E   | 12               | 29               | 33                 | 33                | 37                    |
| NJ01E   | 14               | 32               | 20                 | 22                | 32                    |
| NJ02E   | 12               | 29               | 32                 | 32                | 35                    |
| NJ03E   | 13               | 32               | 35                 | 35                | 33                    |
| NJ04E   | 12               | 30               | 33                 | 30                | 32                    |
| NJ05E   | 13               | 29               | 32                 | 32                | 30                    |
| NJ08E   | 13               | 30               | 32                 | 33                | 27                    |
| NJ09E   | 12               | 27               | 32                 | 33                | 33                    |
| NJ10E   | 13               | 30               | 36                 | 36                | 35                    |
| NJ11E   | 15               | 32               | 20                 | 27                | 35                    |
| NJ12E   | 13               | 31               | 33                 | 34                | 30                    |
| EB01V   | 20               | 34               | 36                 | 36                | 32                    |
| EB02V   | 15               | 34               | 40                 | 36                | 27                    |
| EB03V   | 15               | 35               | 40                 | 32                | 28                    |
| EB04V   | 15               | 34               | 38                 | 35                | 26                    |
| EB05V   | 16               | 35               | 32                 | 30                | 37                    |
| EB06V   | 21               | 30               | 34                 | 32                | 36                    |
| EB07V   | 0                | 28               | 34                 | 30                | 36                    |
| EB08V   | 16               | 28               | 32                 | 34                | 25                    |
| EB09V   | 20               | 40               | 36                 | 36                | 35                    |

|              |    |    |    |    |    |
|--------------|----|----|----|----|----|
| <b>EB10V</b> | 16 | 32 | 35 | 33 | 24 |
| <b>EB11V</b> | 26 | 38 | 40 | 37 | 32 |
| <b>EB12V</b> | 16 | 33 | 35 | 35 | 29 |
| <b>EB13V</b> | 20 | 39 | 40 | 40 | 32 |
| <b>EB14V</b> | 15 | 35 | 40 | 38 | 25 |
| <b>EB15V</b> | 15 | 30 | 36 | 35 | 27 |
| <b>EB01E</b> | 10 | 28 | 33 | 35 | 36 |
| <b>EB02E</b> | 12 | 35 | 32 | 37 | 37 |

**Table S4.** Antimicrobial resistances genes search on all the isolates. The first class of antibiotics searched was polymyxin (*mcr-1*, *mcr-2*, *mcr-3*, *mcr-4*, *mcr-5*, *mcr-6*, *mcr-7*, *mcr-8* and *mcr-9*). – indicates non detected gene and + indicates detected gene.

[illegible]

|       |   |   |   |   |   |   |   |   |   |
|-------|---|---|---|---|---|---|---|---|---|
| NJ12E | - | - | - | - | - | - | - | - | - |
| EB01V | - | - | - | - | - | - | - | - | - |
| EB02V | - | - | - | - | - | - | - | - | - |
| EB03V | - | - | - | - | - | - | - | - | - |
| EB04V | - | - | - | - | - | - | - | - | - |
| EB05V | - | - | - | - | - | - | - | - | - |
| EB06V | - | - | - | - | - | - | - | - | - |
| EB07V | + | - | - | - | - | - | - | - | - |
| EB08V | - | - | - | - | - | - | - | - | - |
| EB09V | - | - | - | - | - | - | - | - | - |
| EB10V | - | - | - | - | - | - | - | - | - |
| EB11V | - | - | - | - | - | - | - | - | - |
| EB12V | - | - | - | - | - | - | - | - | - |
| EB13V | - | - | - | - | - | - | - | - | - |
| EB14V | - | - | - | - | - | - | - | - | - |
| EB15V | - | - | - | - | - | - | - | - | - |
| EB01E | - | - | - | - | - | - | - | - | - |
| EB02E | - | - | - | - | - | - | - | - | - |

**Table S5.** Antimicrobial resistances genes search on all the isolates. The second class was  $\beta$ -lactams (*bla<sub>IMP</sub>*, *bla<sub>VIM</sub>*, *bla<sub>KPC</sub>*, *bla<sub>NDM</sub>*, *bla<sub>OXa</sub>*, *bla<sub>CTX-M</sub>*, *bla<sub>SHV</sub>* and *bla<sub>TEM</sub>*). – indicates non detected gene and + indicates detected gene.

| Isolate | <i>bla<sub>IMP</sub></i> | <i>bla<sub>VIM</sub></i> | <i>bla<sub>KPC</sub></i> | <i>bla<sub>NDM</sub></i> | <i>bla<sub>OXa</sub></i> | <i>bla<sub>CTX-M</sub></i> | <i>bla<sub>SHV</sub></i> | <i>bla<sub>TEM</sub></i> |
|---------|--------------------------|--------------------------|--------------------------|--------------------------|--------------------------|----------------------------|--------------------------|--------------------------|
| NB04V   | -                        | -                        | -                        | -                        | -                        | -                          | -                        | -                        |
| NB08V   | -                        | -                        | -                        | -                        | -                        | -                          | -                        | -                        |
| NB09V   | -                        | -                        | -                        | -                        | -                        | -                          | -                        | -                        |
| NB10V   | -                        | -                        | -                        | -                        | -                        | -                          | -                        | -                        |
| NB11V   | -                        | -                        | -                        | -                        | -                        | -                          | -                        | -                        |
| NB12V   | -                        | -                        | -                        | -                        | -                        | -                          | -                        | -                        |
| NB13V   | -                        | -                        | -                        | -                        | -                        | -                          | -                        | -                        |
| NB14V   | -                        | -                        | -                        | -                        | -                        | -                          | -                        | -                        |
| NB15V   | -                        | -                        | -                        | -                        | -                        | -                          | -                        | -                        |
| NB16B   | -                        | -                        | -                        | -                        | -                        | -                          | -                        | -                        |
| NB17V   | -                        | -                        | -                        | -                        | -                        | -                          | -                        | -                        |
| NB18V   | -                        | -                        | -                        | -                        | -                        | -                          | -                        | -                        |
| NB19V   | -                        | -                        | -                        | -                        | -                        | -                          | -                        | -                        |
| NB20V   | -                        | -                        | -                        | -                        | -                        | -                          | -                        | -                        |
| NB21V   | -                        | -                        | -                        | -                        | -                        | -                          | -                        | -                        |
| NJ01V   | -                        | -                        | -                        | -                        | -                        | -                          | -                        | -                        |
| NJ02V   | -                        | -                        | -                        | -                        | -                        | -                          | -                        | -                        |
| NJ04V   | -                        | -                        | -                        | -                        | -                        | -                          | -                        | -                        |
| NJ06V   | -                        | -                        | -                        | -                        | -                        | -                          | -                        | -                        |
| NJ07V   | -                        | -                        | -                        | -                        | -                        | -                          | -                        | -                        |
| NJ10V   | -                        | -                        | -                        | -                        | -                        | -                          | -                        | -                        |
| NJ12V   | -                        | -                        | -                        | -                        | -                        | -                          | -                        | -                        |
| NJ13V   | -                        | -                        | -                        | -                        | -                        | -                          | -                        | -                        |
| NJ14V   | -                        | -                        | -                        | -                        | -                        | -                          | -                        | -                        |
| NJ15V   | -                        | -                        | -                        | -                        | -                        | -                          | -                        | -                        |
| NJ18V   | -                        | -                        | -                        | -                        | -                        | -                          | -                        | -                        |
| NJ21V   | -                        | -                        | -                        | -                        | -                        | -                          | -                        | -                        |
| NJ22V   | -                        | -                        | -                        | -                        | -                        | -                          | -                        | -                        |
| NB01E   | -                        | -                        | -                        | -                        | -                        | -                          | -                        | -                        |
| NB02E   | -                        | -                        | -                        | -                        | -                        | -                          | -                        | -                        |
| NB03E   | -                        | -                        | -                        | -                        | -                        | -                          | -                        | -                        |
| NB04E   | -                        | -                        | -                        | -                        | -                        | -                          | -                        | -                        |

|       |   |   |   |   |   |   |   |   |
|-------|---|---|---|---|---|---|---|---|
| NB05E | - | - | - | - | - | - | - | - |
| NJ01E | - | - | - | - | - | - | - | - |
| NJ02E | - | - | - | - | - | - | - | - |
| NJ03E | - | - | - | - | - | - | - | - |
| NJ04E | - | - | - | - | - | - | - | - |
| NJ05E | - | - | - | - | - | - | - | - |
| NJ08E | - | - | - | - | - | - | - | - |
| NJ09E | - | - | - | - | - | - | - | - |
| NJ10E | - | - | - | - | - | - | - | - |
| NJ11E | - | - | - | - | - | - | - | - |
| NJ12E | - | - | - | - | - | - | - | - |
| EB01V | - | - | - | - | - | - | - | - |
| EB02V | - | - | - | - | - | - | - | - |
| EB03V | - | - | - | - | - | - | - | - |
| EB04V | - | - | - | - | - | - | - | - |
| EB05V | - | - | - | - | - | - | - | - |
| EB06V | - | - | - | - | - | - | - | - |
| EB07V | - | - | - | - | - | - | - | - |
| EB08V | - | - | - | - | - | - | - | - |
| EB09V | - | - | - | - | - | - | - | - |
| EB10V | - | - | - | - | - | - | - | - |
| EB11V | - | - | - | - | - | - | - | - |
| EB12V | - | - | - | - | - | - | - | - |
| EB13V | - | - | - | - | - | - | - | - |
| EB14V | - | - | - | - | - | - | - | - |
| EB15V | - | - | - | - | - | - | - | - |
| EB01E | - | - | - | - | - | - | - | - |
| EB02E | - | - | - | - | - | - | - | - |

**Table S6.** Antimicrobial resistances genes search on all the isolates. The third antimicrobial class searched was quinolone (*qnrA*, *qnrB*, *qnrC*, *qnrD*, *qnrS* and *qepA*). – indicates non detected gene and + indicates detected gene.

| Isolate | <i>qnrA</i> | <i>qnrB</i> | <i>qnrC</i> | <i>qnrD</i> | <i>qnrS</i> | <i>qepA</i> |
|---------|-------------|-------------|-------------|-------------|-------------|-------------|
| NB04V   | -           | -           | -           | -           | -           | -           |
| NB08V   | -           | -           | -           | -           | -           | -           |
| NB09V   | -           | -           | -           | -           | -           | -           |
| NB10V   | -           | -           | -           | -           | -           | -           |
| NB11V   | -           | -           | -           | -           | -           | -           |
| NB12V   | -           | -           | -           | -           | -           | -           |
| NB13V   | -           | -           | -           | -           | -           | -           |
| NB14V   | -           | -           | -           | -           | -           | -           |
| NB15V   | -           | -           | -           | -           | -           | -           |
| NB16B   | -           | -           | -           | -           | -           | -           |
| NB17V   | -           | -           | -           | -           | -           | -           |
| NB18V   | -           | -           | -           | -           | -           | -           |
| NB19V   | -           | -           | -           | -           | -           | -           |
| NB20V   | -           | -           | -           | -           | -           | -           |
| NB21V   | -           | -           | -           | -           | -           | -           |
| NJ01V   | -           | -           | -           | -           | -           | -           |
| NJ02V   | -           | -           | -           | -           | -           | -           |
| NJ04V   | -           | -           | -           | -           | -           | -           |
| NJ06V   | -           | -           | -           | -           | -           | -           |
| NJ07V   | -           | -           | -           | -           | -           | -           |

|       |   |   |   |   |   |   |
|-------|---|---|---|---|---|---|
| NJ10V | - | - | - | - | - | - |
| NJ12V | - | - | - | - | - | - |
| NJ13V | - | - | - | - | - | - |
| NJ14V | - | - | - | - | - | - |
| NJ15V | - | - | - | - | - | - |
| NJ18V | - | - | - | - | - | - |
| NJ21V | - | - | - | - | - | - |
| NJ22V | - | - | - | - | - | - |
| NB01E | - | - | - | - | - | - |
| NB02E | - | - | - | - | - | - |
| NB03E | - | - | - | - | - | - |
| NB04E | - | - | - | - | - | - |
| NB05E | - | - | - | - | - | - |
| NJ01E | - | - | - | - | - | - |
| NJ02E | - | - | - | - | - | - |
| NJ03E | - | - | - | - | - | - |
| NJ04E | - | - | - | - | - | - |
| NJ05E | - | - | - | - | - | - |
| NJ08E | - | - | - | - | - | - |
| NJ09E | - | - | - | - | - | - |
| NJ10E | - | - | - | - | - | - |
| NJ11E | - | - | - | - | - | - |
| NJ12E | - | - | - | - | - | - |
| EB01V | - | - | - | - | - | - |
| EB02V | - | - | - | - | - | - |
| EB03V | - | - | - | - | - | - |
| EB04V | - | - | - | - | - | - |
| EB05V | - | - | - | - | - | - |
| EB06V | - | - | - | - | - | - |
| EB07V | - | - | - | - | - | - |
| EB08V | - | - | - | - | - | - |
| EB09V | - | - | - | - | - | - |
| EB10V | - | - | - | - | - | - |
| EB11V | - | - | - | - | - | - |
| EB12V | - | - | - | - | - | - |
| EB13V | - | - | - | - | - | - |
| EB14V | - | - | - | - | - | - |
| EB15V | - | - | - | - | - | - |
| EB01E | - | - | - | - | - | - |
| EB02E | - | - | - | - | - | - |



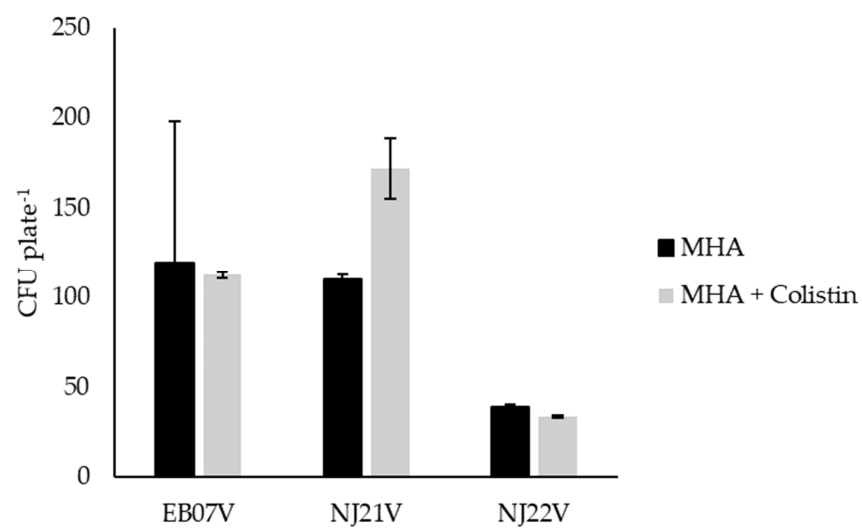

**Figure S1.** Plasmid curing of the isolates EB07V, NJ21V and NJ22V. The concentrations of ethidium bromide were: 0.05 g L<sup>-1</sup> for EB07V, 0.025 g L<sup>-1</sup> for NJ21V and NJ22V. The number of CFU was determined in MHA plates with and without colistin.
